# Supplementary material for: Effect of Short-Term Low-Nitrogen Addition on Carbon, Nitrogen and Phosphorus of Vegetation-Soil in Alpine Meadow
Source: MDPI journal article supplement (doi:10.3390/ijerph182010998), 2021-10-19
Supplement: s1 [file s1]

Table S1. Correlations between nitrogen deposition rates (x) and community characteristics (y).

|            | Cover (%)                       | Species<br>number | Aboveground<br>biomass (g m <sup>-2</sup> ) | Belowground<br>biomass (g m <sup>-2</sup> ) | R/S           |
|------------|---------------------------------|-------------------|---------------------------------------------|---------------------------------------------|---------------|
| N addition | <b><math>R^2 = 0.906</math></b> | $R^2 = 0.963$     | $R^2 = 0.903$                               | $R^2 = 0.856$                               | $R^2 = 0.824$ |
| rates      | <b><math>P = 0.032</math></b>   | $P = 0.111$       | $P = 0.180$                                 | $P = 0.219$                                 | $P = 0.061$   |

Table S2. Correlations between nitrogen deposition rates (x) and vegetation TC, TN and TP  
(shoots and roots, y)

|                     |        | TC            | TN                     | TP                     |
|---------------------|--------|---------------|------------------------|------------------------|
| N addition<br>rates | Shoots | $R^2 = 0.753$ | $R^2 = \mathbf{0.851}$ | $R^2 = \mathbf{0.934}$ |
|                     |        | $P = 0.287$   | $P = \mathbf{0.050}$   | $P = \mathbf{0.022}$   |
|                     | Roots  | $R^2 = 0.639$ | $R^2 = \mathbf{0.948}$ | $R^2 = \mathbf{0.999}$ |
|                     |        | $P = 0.347$   | $P = \mathbf{0.017}$   | $P < \mathbf{0.001}$   |

Table S3. Correlations between nitrogen deposition rates (x) and soil property (y)

|                     |             | pH                              | DOC                             | NO <sub>3</sub> <sup>-</sup> -N | NH <sub>4</sub> <sup>+</sup> -N | TC            | TN            | TP            |
|---------------------|-------------|---------------------------------|---------------------------------|---------------------------------|---------------------------------|---------------|---------------|---------------|
| N addition<br>rates | Rhizosphere | $R^2 = 0.451$                   | $R^2 = 0.961$                   | <b><math>R^2 = 0.889</math></b> | $R^2 = 0.675$                   | $R^2 = 0.605$ | $R^2 = 0.416$ | $R^2 = 0.942$ |
|                     |             | $P = 0.428$                     | $P = 0.113$                     | <b><math>P = 0.038</math></b>   | $P = 0.330$                     | $P = 0.363$   | $P = 0.441$   | $P = 0.140$   |
|                     | Bulk        | <b><math>R^2 = 0.903</math></b> | <b><math>R^2 = 0.959</math></b> | <b><math>R^2 = 0.977</math></b> | $R^2 = 0.878$                   | $R^2 = 0.749$ | $R^2 = 0.784$ | $R^2 = 0.850$ |
|                     |             | <b><math>P = 0.033</math></b>   | <b><math>P = 0.014</math></b>   | <b><math>P = 0.008</math></b>   | $P = 0.202$                     | $P = 0.087$   | $P = 0.075$   | $P = 0.051$   |



Table S5. Correlations between soil (rhizosphere and bulk, x) and vegetation C:N, C:N and N:P (shoots and roots, y).

|                         |                                     | <b>Shoots</b>                |                               |                               | <b>Roots</b>                  |                               |                               |
|-------------------------|-------------------------------------|------------------------------|-------------------------------|-------------------------------|-------------------------------|-------------------------------|-------------------------------|
|                         |                                     | <b>C:N</b>                   | <b>C:P</b>                    | <b>N:P</b>                    | <b>C:N</b>                    | <b>C:P</b>                    | <b>N:P</b>                    |
| <b>Rhizosphere soil</b> | <b>C:N</b>                          | $R^2 = 0.579$<br>$P = 0.152$ |                               |                               | $R^2 = -0.463$<br>$P = 0.844$ |                               |                               |
|                         | <b>C:P</b>                          |                              | $R^2 = -0.443$<br>$P = 0.804$ |                               |                               | $R^2 = -0.008$<br>$P = 0.422$ |                               |
|                         | <b>N:P</b>                          |                              |                               | $R^2 = -0.257$<br>$P = 0.597$ |                               |                               | $R^2 = -0.377$<br>$P = 0.713$ |
| <b>Bulk soil</b>        | <b>C:N</b>                          | $R^2 = 0.383$<br>$P = 0.233$ |                               |                               | $R^2 = -0.383$<br>$P = 0.721$ |                               |                               |
|                         | <b>NO<sub>3</sub><sup>-</sup>-N</b> |                              | $R^2 = -0.376$<br>$P = 0.713$ |                               |                               | $R^2 = -0.493$<br>$P = 0.933$ |                               |
|                         | <b>N:P</b>                          |                              |                               | $R^2 = -0.386$<br>$P = 0.724$ |                               |                               | $R^2 = -0.286$<br>$P = 0.622$ |
